# Supplementary material for: Upper-Body versus Lower-Body Cooling in Individuals with Paraplegia during Arm-Crank Exercise in the Heat
Source: PubMed Central journal article supplement (PMC10581408; doi:10.1249/mss.0000000000003244), 2023-06-30
Supplement: msse-55-2014-s001.pdf [file msse-55-2014-s001.pdf]

# Supplemental Digital Content 1

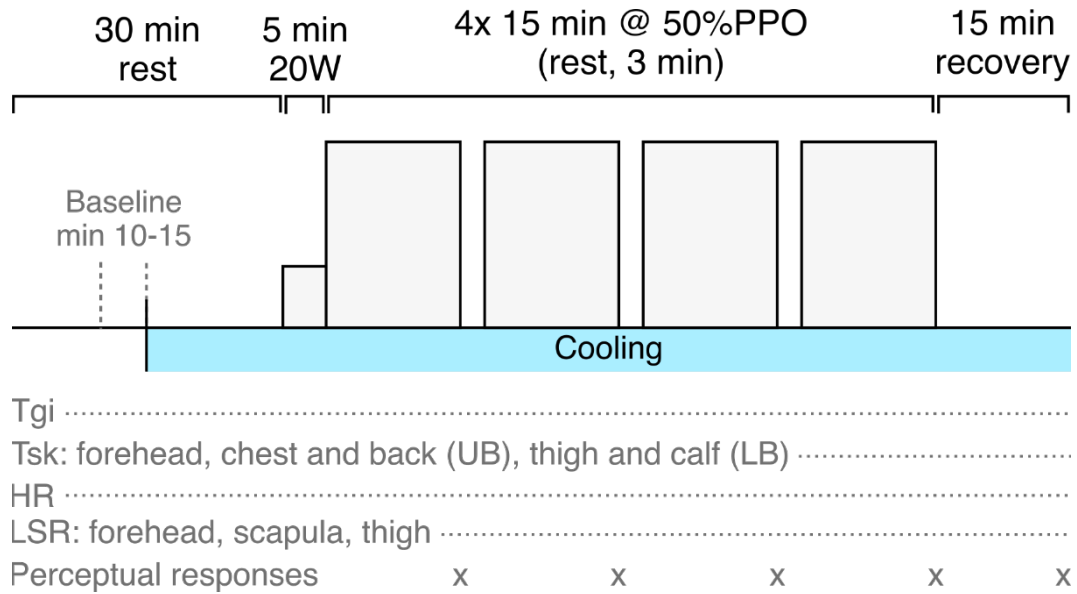

**Supplemental Figure 1.** Heat stress test protocol and measurements. PPO, peak power output; Tgi, gastrointestinal temperature; Tsk, skin temperature; HR, heart rate; LSR, local sweat rate.
