# Supplementary material for: Upper-Body versus Lower-Body Cooling in Individuals with Paraplegia during Arm-Crank Exercise in the Heat
Source: PubMed Central journal article supplement (PMC10581408; doi:10.1249/mss.0000000000003244), 2023-06-30
Supplement: msse-55-2014-s002.pdf [file msse-55-2014-s002.pdf]

## Supplemental Digital Content 3

One participant (herein referred to as ppA) showed abnormal  $T_{gi}$  data at rest in the control condition, which strongly influenced the analysis of  $T_{gi}$  relative to baseline ( $\Delta T_{gi}$ ). Considering the uncertainty about the accuracy of this participant's data, we also performed the  $T_{gi}$  analyses without these data. The results are presented below, as well as the  $T_{gi}$  curves of the respective participant.

### 1-way repeated measures analyses, main effects

|                                            | Test  | Condition                                            |
|--------------------------------------------|-------|------------------------------------------------------|
| Peak $T_{gi}$ , $n = 12$                   | ANOVA | $F(1.9) = 5.6, p = \mathbf{0.01}, \eta^2_G = 0.05$   |
| Peak $T_{gi}$ , $n = 11$ (exclusion ppA)   | ANOVA | $F(2.5) = 10.2, p < \mathbf{0.001}, \eta^2_G = 0.08$ |
| $\Delta T_{gi}$ , $n = 12$                 | ANOVA | $F(2.0) = 1.4, p = 0.26, \eta^2_G = 0.03$            |
| $\Delta T_{gi}$ , $n = 11$ (exclusion ppA) | ANOVA | $F(2.3) = 4.9, p = \mathbf{0.02}, \eta^2_G = 0.07$   |

$T_{gi}$ , gastrointestinal temperature.

### Pairwise comparisons for significant effects

|                                                               | COOL-UB        | COOL-LB        | CON            | COOL-UB - CON                                                                | COOL-LB - CON                                                     | COOL-UB - COOL-LB                                                 |
|---------------------------------------------------------------|----------------|----------------|----------------|------------------------------------------------------------------------------|-------------------------------------------------------------------|-------------------------------------------------------------------|
| Peak $T_{gi}$ ( $^{\circ}\text{C}$ ),<br>$n = 12$             | $38.0 \pm 0.4$ | $38.2 \pm 0.4$ | $38.3 \pm 0.5$ | $-0.2 (-0.4, -0.1) ^{\circ}\text{C}$ ,<br>$t(11) = -4.0, p = \mathbf{0.006}$ | $-0.1 (-0.3, 0.1) ^{\circ}\text{C}$ ,<br>$t(11) = -1.1, p = 0.88$ | $-0.1 (-0.3, 0.0) ^{\circ}\text{C}$ ,<br>$t(11) = -2.2, p = 0.16$ |
| Peak $T_{gi}$ ( $^{\circ}\text{C}$ ),<br>$n = 11$ (ex. ppA)   | $38.1 \pm 0.4$ | $38.2 \pm 0.4$ | $38.4 \pm 0.5$ | $-0.3 (-0.4, -0.1) ^{\circ}\text{C}$ ,<br>$t(10) = -4.8, p = \mathbf{0.002}$ | $-0.2 (-0.3, 0.0) ^{\circ}\text{C}$ ,<br>$t(10) = -2.6, p = 0.08$ | $-0.1 (-0.3, 0.0) ^{\circ}\text{C}$ ,<br>$t(10) = -1.7, p = 0.34$ |
| $\Delta T_{gi}$ ( $^{\circ}\text{C}$ ),<br>$n = 11$ (ex. ppA) | $1.1 \pm 0.4$  | $1.2 \pm 0.4$  | $1.4 \pm 0.4$  | $-0.3 (-0.4, -0.1) ^{\circ}\text{C}$ ,<br>$t(10) = -3.4, p = \mathbf{0.02}$  | $-0.2 (-0.4, 0.1) ^{\circ}\text{C}$ ,<br>$t(10) = -1.7, p = 0.34$ | $-0.1 (-0.3, 0.1) ^{\circ}\text{C}$ ,<br>$t(10) = -1.2, p = 0.78$ |

COOL-UB, upper-body cooling; COOL-LB, lower-body cooling; CON, control;  $T_{gi}$ , gastrointestinal temperature; Average data are presented as mean  $\pm$  SD. Mean differences are presented as mean (95% CI).

## T<sub>gi</sub> curves for ppA

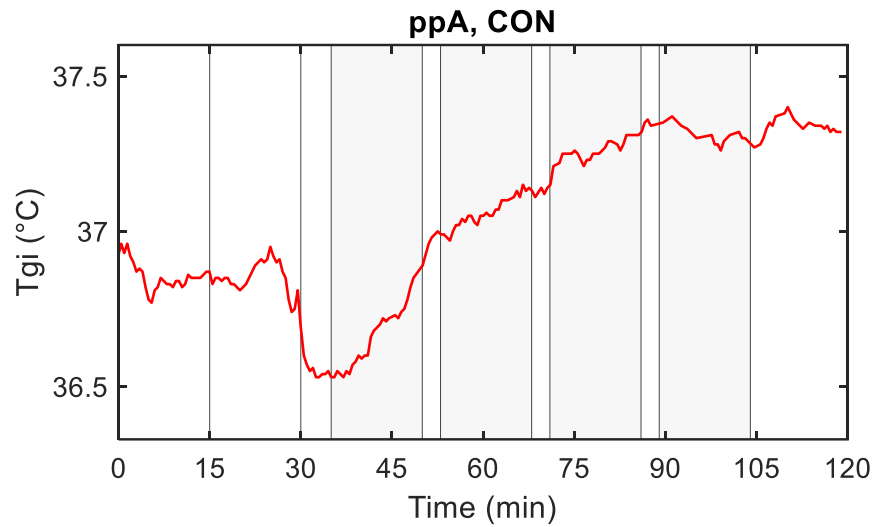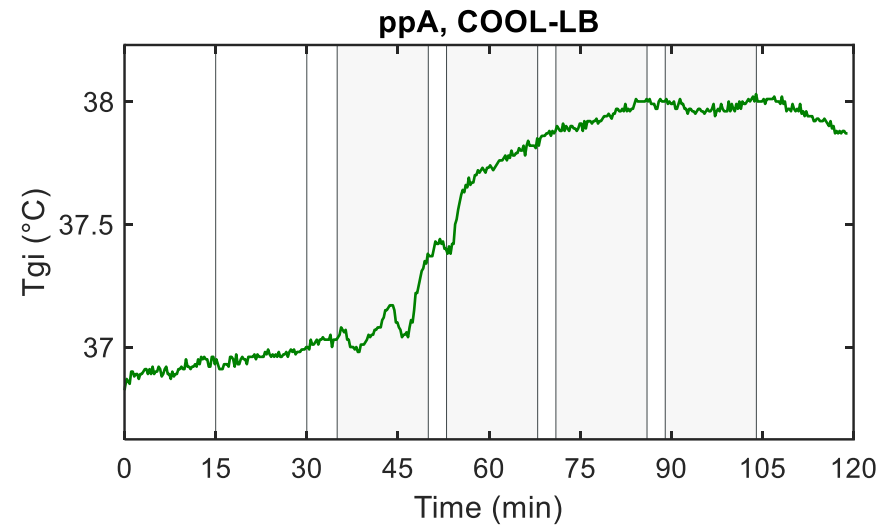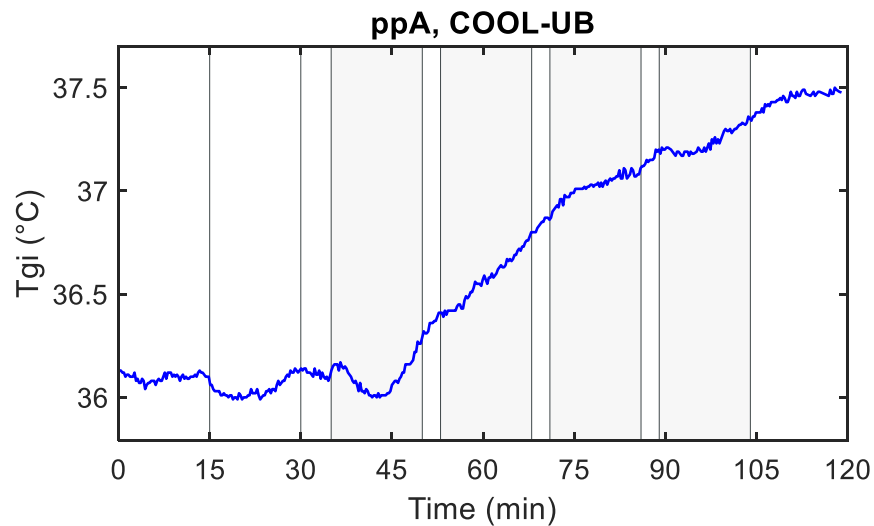

### Comments:

Min 0-15: Rest (with min 10-15 = baseline measure).

Min 15-30: Rest with cooling.

Min 30-35: Warm-up at 20W.

Min 35-105: 4 exercise blocks of 15 min.

In CON, T<sub>gi</sub> shows a sudden drop of ~0.3 °C just before exercise, for unclear reasons. We suspect it does not accurately represent a change in core temperature, and that it is an artefact (e.g., due to displacement of the capsule in the intestines).
